1           **The role of glucocorticoids in naturally fasting grey seal**  
2           **(*Halichoerus grypus*) pups: dexamethasone stimulates mass loss and**  
3           **protein utilisation, but not departure from the colony**

4  
5           **K. A. Bennett<sup>1</sup>, M. A. Fedak<sup>2</sup>, S. E. W. Moss<sup>2</sup>, P. P. Pomeroy<sup>2</sup>, J. R. Speakman<sup>3</sup>, A. J. Hall<sup>2</sup>**

6  
7           1 Marine Biology and Ecology Research Centre, School of Marine Science and Engineering,  
8           Portland Square, Drake Circus, Plymouth University, UK. PL4 8AA. Tel: 01752 584632 E-mail:  
9           kimberley.bennett@plymouth.ac.uk

10          2 NERC Sea Mammal Research Unit, Gatty Marine Laboratories, Scottish Oceans Institute,  
11          University of St Andrews, St Andrews, Fife, UK. KY16 8LB

12          3 Institute of Biological and Environmental Sciences, Zoology Building, Tillydrone Ave.,  
13          Aberdeen, UK. AB24 2TZ

14  
15          **Short title: GC and protein use in fasting seal pups**

16          **Key words:** cortisol, body composition, deuterium dilution

17

18 **Summary**

19 Seals must manage their energy reserves carefully while they fast on land to ensure they go to  
20 sea with sufficient fuel to sustain them until they find food. Glucocorticoids (GC) have been  
21 implicated in the control of fuel metabolism and termination of fasting in pinnipeds. Here we  
22 tested the hypothesis that dexamethasone, an artificial GC, increases fat and protein catabolism,  
23 and induces departure from the breeding colony in wild, fasting grey seal pups. A single  
24 intramuscular dose of dexamethasone completely suppressed cortisol production for 24-72 hours,  
25 demonstrating activation of GC receptors. In experiment 1, we compared the effects of a single  
26 dose of dexamethasone or saline administered ten days after weaning on fasting mass and body  
27 composition changes, cortisol, blood urea nitrogen (BUN) and glucose levels, and timing of  
28 departure from the colony. In experiment 2, we investigated the effects of dexamethasone on  
29 short-term (5 days) changes in mass loss, body composition and BUN. In experiment 1,  
30 dexamethasone induced a short-lived increase in mass loss, but there was no difference in timing  
31 of departure between dexamethasone and saline treated pups (n = 10). In experiment 2,  
32 dexamethasone increased protein and water loss and prevented a decrease in BUN levels (n = 11).  
33 Our data suggest changes in cortisol contribute to regulation of protein catabolism in fasting seal  
34 pups, irrespective of the sex of the animal, but do not terminate fasting. By affecting the rate of  
35 protein depletion, lasting changes in cortisol levels could influence the amount of time seal pups  
36 have to find food, and thus may have important consequences for their survival.

37

## 38 **Introduction:**

39 The mechanisms that regulate fuel use and the onset of foraging behaviour in fasting seal pups  
40 are poorly understood. Most phocid pups fast on land after weaning during which time they  
41 undergo physiological changes that prepare them for diving (Burns et al., 2007; Lewis et al.,  
42 2001; Noren et al., 2005; Soñanez-Organis et al., 2012; Thorson and Le Boeuf, 1994; Vásquez-  
43 Medina et al., 2010; 2011). The duration of the postweaning fast has a positive effect on diving  
44 capabilities when pups first go to sea (Bennett et al., 2010). Larger pups are also better divers  
45 (Bennett et al., 2010; Burns et al., 1997; Burns and Castellini, 1996; Hindell et al., 1999; Irvine  
46 et al., 2000) and have an increased probability of survival (Hall et al., 2001; 2002; 2009; Harding  
47 et al., 2005; Hindell, 1991; Le Boeuf et al., 1994; McMahon et al., 2000). While larger pups can  
48 undergo a long fast and leave the colony with sufficient reserves (Arnbom et al., 1993; Noren et  
49 al., 2008; Noren and Mangel, 2004), smaller pups face a trade-off between the need to develop  
50 whilst fasting on land, and the need to learn to forage successfully at sea before energy stores  
51 become critically reduced (McConnell et al., 2002). This requires careful management of  
52 endogenous fuel reserves during the postweaning fast, and appropriate timing of departure from  
53 the colony well in advance of fuel depletion (McConnell et al., 2002). The duration of fasting  
54 can be dictated by the size and rate of utilisation of their fat and protein depots (Bennett et al.,  
55 2007; Noren et al., 2008; Noren and Mangel, 2004; Reilly, 1991). Although pups have  
56 substantial fat reserves, the availability of expendable protein depots is limited (Bennett et al.,  
57 2007; Caloin, 2004). Fuel allocation during fasting is thus likely to impact upon survival.

58         Effective fuel management and appropriate timing of departure require a mechanism  
59 whereby information about the state of fuel depots is relayed to the central nervous system and  
60 periphery to effect appropriate changes in energy use and behaviour patterns. The co-ordination  
61 of an integrated behavioural and physiological response to changes in fuel availability is  
62 achieved in other mammals through the action of hormonal intermediaries. Glucocorticoids (GC)  
63 are responsive to changes in fuel supply and metabolism and effect changes in energy acquisition  
64 and utilisation in other mammals, thereby regulating long term energy balance in conjunction  
65 with other metabolic and endocrine signals. GC enhance the gluconeogenic capacity of the liver,  
66 increasing blood glucose levels. They facilitate the mobilisation of fat (Divertie et al., 1991;  
67 Djurhuus et al., 2002; 2004; Samra et al., 1998) and/ or protein reserves as gluconeogenic

68 precursors (Darmaun et al., 1988; Legaspi et al., 1985; Simmons et al., 1984; Weiler et al., 1997).  
69 Increased GC direct fuel utilisation towards an increased reliance on protein catabolism, and  
70 promote food-seeking behaviour through appetite centres in the brain in rodents, humans, horses  
71 (*Equus ferus caballus*) penguins and bottlenose dolphins (*Tursiops truncatus*) (Challet et al.,  
72 1995; Chen and Romsos, 1996; Debons et al., 1986; Groscolas and Robin, 2001; Koubi et al.,  
73 1994; Reidarson and McBain, 1999; Robin et al., 1998). If GC act in a similar way in grey seals  
74 (*Halichoerus grypus*; Fabricius) as they do in other animals, they may be involved in the control  
75 of fuel use during fasting and timing of departure from the colony. Cortisol, the major GC in  
76 pinnipeds, has been implicated in both these roles in pinnipeds (Crocker et al., 2012; Guinet et al.,  
77 2004; Ortiz et al., 2001a and b; Verrier et al., 2012). Cortisol levels have been measured in  
78 fasting pinnipeds, and tend to be stable, for example in fasting grey and harp seal (*Pagophilus*  
79 *groenlandicus*) pups, Subantarctic fur seal pups (*Arctocephalus tropicalis*) and juvenile and  
80 breeding male northern elephant seals (*Mirounga angustirostris*) (Bennett et al., 2012; Crocker et  
81 al., 2012; Kelso et al., 2012; Nordøy et al., 1990; 1993; Verrier et al., 2012). In some studies,  
82 fasting individuals show an increase in cortisol, such as fasting elephant seals pups and lactating  
83 female Subantarctic fur seals (Guinet et al., 2004; Ortiz et al., 2001a and b). There is no clear  
84 relationship between cortisol and glucose in the blood in fasting pinnipeds (Crocker et al., 2012;  
85 Kelso et al., 2012; Verrier et al., 2012), making it difficult to make inferences about its role in  
86 fuel allocation. However, handling increases cortisol, glucose levels and gluconeogenesis in  
87 physically restrained elephant seal pups (Champagne et al., 2012). Crucially, there is no  
88 experimental evidence for the proposed roles of cortisol in either fuel allocation or initiation of  
89 foraging behaviour in pinnipeds.

90 Here we tested the hypotheses that (i) GC induce long or short term mass loss through  
91 increased fat and/ or protein catabolism and (ii) that GC induce departure from the colony in grey  
92 seal pups. We performed an initial study to determine the effect and time course of a single  
93 intramuscular dose of dexamethasone, a potent and long-acting artificial cortisol analogue, on  
94 cortisol levels in captive grey seal pups-of-the-year (10 months of age). We then investigated the  
95 effect of dexamethasone on body composition changes, metabolite and cortisol levels and timing  
96 of departure from the colony in wild, fasting pups.

## 97 **Materials and Methods:**

98 Capture and handling procedures were performed under Home Office project licence #60/2589  
99 and conformed to the UK Animals (Scientific Procedures) Act, 1986.

100 **Time course study:** Two 10-month old grey seal pups in the captive facility at the Sea Mammal  
101 Research Unit (SMRU), St. Andrews, Scotland, were used to investigate the safety, efficacy and  
102 time-course of the effect of a single intramuscular dose ( $50 \mu\text{g kg}^{-1}$ ) of dexamethasone  
103 (Dexadreson®: Intervet, Milton Keynes, UK; 2mg/ml dexamethasone sodium phosphate), on  
104 serum levels of cortisol. The physiological effects of dexamethasone are mediated by  
105 glucocorticoid receptors (GR). Through activation of GR in the hypothalamus and pituitary,  
106 dexamethasone, like endogenous GC, reduces cortisol concentrations by down regulating  
107 secretion of adrenocorticotrophic hormone (ACTH) and corticotropin releasing hormone (CRH),  
108 which form the negative feedback loop that controls cortisol secretion. In this study, its ability to  
109 reduce cortisol secretion was used as an indication that the dose of dexamethasone was sufficient  
110 to activate GR and thus induce other GR-mediated physiological effects of GC.

111 The pups were held together with access to a small pool and a dry area for the duration of  
112 the experiment. Both pups had been trained to station on a specific focus shape with fish as a  
113 food reward to minimize stress while moving the animals to the small dry area used during  
114 manual restraint and blood sampling. The pups were left in the dry area for 20 min prior to  
115 restraint and sampling to dissociate the response to the focus shapes and feeding from the  
116 experience of being handled. They were allowed to return to the pool area immediately after  
117 each sampling period.

118 A plasma sample was taken from the extradural vein into a heparin-coated vacutainer  
119 (Becton Dickenson, Oxford, UK) at 09:00 on day 1 (0 h), followed by an intramuscular injection  
120 of  $0.1 \text{ ml kg}^{-1}$  Terramycin® (Pfizer, Maidenhead, UK) to provide antibiotic cover. The animals  
121 were then injected on the opposite side of the body with either  $0.025 \text{ ml kg}^{-1}$  Dexadreson® or  
122 the equivalent volume of sterile saline solution (Aquapharm, York, UK). Blood samples were  
123 then taken 4, 8, 12, 24, 48 and 72 h after injection. The saline trial was performed first in each  
124 case, and the animals were given 24 hours recovery between the two trials.

125 As described previously (Bennett et al., 2012), plasma was centrifuged in a swing-out  
126 bench top centrifuge at 2000g for 15 minutes, as soon as possible, and within ten hours, after

127 sample collection. Aliquots were transferred to 500 $\mu$ l microtubes using glass pasteur pipettes,  
128 and stored at  $-20^{\circ}\text{C}$  until analysis, which occurred within 8 months of sample collection.

129 **Impact of dexamethasone on wild, fasting grey seal pups:** We examined the effects of  
130 dexamethasone on plasma cortisol, blood urea nitrogen (BUN) and glucose levels (indices of  
131 increased proteolysis), mass and body composition changes and timing of departure from the  
132 colony in thirty grey seal pups born on the Isle of May, in the Firth of Forth, Scotland ( $56^{\circ} 11' \text{ N}$ ,  
133  $2^{\circ} 33' \text{ W}$ ) in October and November of 2002 (experiment 1). All pups were captured early (age  
134  $\sim$  four days) and late ( $\sim$ age 15 days) in the suckling period to obtain mass transfer information as  
135 part of a long term study. Weaning, determined from daily observations of mother-pup pairs,  
136 occurred  $2.4 \pm 1.9$  days after the late suckling capture. Pups were penned in a large outdoor  
137 enclosure within two days of weaning to allow them to be located easily without disturbing other  
138 animals on the colony (Bennett et al., 2007). On entry to the pen, each animal was assigned to  
139 one of three treatment groups (CONTROL, SAL<sub>1</sub> or DEX<sub>1</sub> (subscripts to distinguish groups from  
140 experiment 2) based on its weaning mass and sex, such that, as far as possible, each group  
141 contained ten animals of a range of sizes and a similar number of males and females (Table 1).  
142 Body mass was measured using a 50 kg ( $\pm 0.2$  kg) or, where the pups were  $> 50$  kg, a 100 kg ( $\pm$   
143 0.5 kg) Salter spring balance and blood samples were taken every three days. Blood samples  
144 were obtained as quickly as possible ( $1.84 \pm 1.27$  min; range = 1-8 min) after first contact with  
145 the animal, before the pup was weighed, and between 09:00 and 12:00, to minimise the effects of  
146 stress and circadian rhythms on cortisol and metabolite measurements. At ten days postweaning  
147 pups were given intramuscular Terramycin® to provide antibiotic cover, and either no additional  
148 injection (CONTROL), 0.025 ml kg<sup>-1</sup> sterile saline (SAL<sub>1</sub>) or 0.025 ml kg<sup>-1</sup> Dexadreson ®  
149 (DEX<sub>1</sub>). A blood sample was taken 24 hours later and pups were released from the pen and  
150 allowed to range freely for the remainder of the fast. They were given a unique painted letter  
151 mark on the back and their presence/absence on the colony was noted daily. Pups still present on  
152 the colony after release were re-measured and blood sampled every three days until departure of  
153 the animal or 34 days after weaning, whichever happened sooner. The date of departure was  
154 assumed to be the day after the last sighting of the animal. One pup from the CONTROL group  
155 was excluded from the study because it developed an infection.

156 In 2004 (experiment 2), thirty suckling stage IV (Woldstad and Jenssen, 1999), partially  
157 moulted pups were given individual identification marks using yellow paint and monitored daily  
158 to determine date of weaning. Pups were brought into the pen 1- 4 days after weaning (mean =  
159  $1.47 \pm 0.97$  days) and after they had completely moulted. They were assigned to either DEX<sub>2</sub> or  
160 SAL<sub>2</sub> groups using the same criteria as in 2002 to give 15 animals in each group (Table 1) and  
161 were given an intramuscular dose of either dexamethasone or saline, as described above. Body  
162 mass measurement and blood sampling was performed on entry into the pen and again five days  
163 later, when they were released.

164 **Body composition measurements:** In experiment 1, body composition of 22 pups (CONTROL:  
165 n = 5; SAL<sub>1</sub> n = 7; DEX<sub>1</sub> n = 8) was measured at each capture during suckling, and again in 11  
166 pups (CONTROL and SAL<sub>1</sub> pups combined: n = 6 with 3 males and 3 females; DEX<sub>1</sub>: n = 5 with  
167 2 males and 3 females)  $6.79 \pm 2.42$  days after dexamethasone or saline injection ( $17.5 \pm 3.1$   
168 (range = 14-22) days postweaning). In experiment 2, body composition measurement was  
169 performed in 10 of the SAL<sub>2</sub> and 11 of the DEX<sub>2</sub> pups at the same time as mass measurements  
170 and blood sampling on entry to the pen and five days later. Body composition was measured  
171 using deuterium oxide (<sup>2</sup>[H]<sub>2</sub>O) dilution (Reilly and Fedak, 1990) as described previously  
172 (Bennett et al., 2007; 2010). Briefly, after the animal was weighed, a blood sample was  
173 collected from the extradural vein, both before and 3-4.5 h (Bennett et al., 2007; Costa et al.,  
174 1986; Reilly, 1991) after intravenous injection of a pre-weighed dose of 3-5 ml <sup>2</sup>[H]<sub>2</sub>O (99.9%;  
175 Sigma-Aldrich Chemicals, Gillingham, Dorset, UK). <sup>2</sup>[H]<sub>2</sub>O enrichment in parts per million in  
176 two sub-samples of the background and enriched plasma samples and standards was measured in  
177 duplicate in a Micromass isoprime pyrolysis inlet mass spectrometer (Speakman and Krol, 2005;  
178 Speakman and Racey, 1987: method D). Dilution space was calculated (Krol and Speakman,  
179 1999) and percentage and absolute mass of fat, protein, water and ash were determined from  
180 body water content, using equations derived by comparison of <sup>2</sup>[H]<sub>2</sub>O dilution with chemical  
181 composition of grey seal carcasses (Reilly and Fedak, 1990). Mass and body composition at  
182 weaning in experiment 1 were determined by extrapolation using rates of change in mass and  
183 body components during suckling (Bennett et al., 2007; 2010).

184 **Blood sample analysis:** Serum cortisol concentrations in captive pups and wild pups from  
185 experiment 1 were quantified in duplicate using a Spectria <sup>125</sup>I -cortisol radioimmunoassay

186 (Orion Diagnostica, Espoo, Finland), previously validated for use in grey seal serum (Bennett et  
187 al., 2012). Inter and intra assay coefficients of variation (% CV) for seal serum are <11% and  
188 <10%, respectively, and percentage recovery is 82.75-91.64% for this assay (Bennett et al.,  
189 2012). BUN for all samples was measured in duplicate using Randox kit # UR107 (Randox  
190 Laboratories Ltd., Crumlin, Co. Antrim, UK) according to the manufacturers' instructions.  
191 Glucose was measured in duplicate in plasma from the captive pups and 23 of the 30 pups  
192 throughout the fast in experiment 1 using Sigma kit # 510 adapted for use in 96 well plates.

193 **Statistical analysis:** All statistical analyses were performed in Minitab 15 or R (R 1.9.1, R  
194 Development Core Team, 2003; Ihaka and Gentleman, 1996). Anderson-Darling tests were used  
195 to check that continuous data had a normal distribution, and values were log transformed where  
196 appropriate. F tests and Bartlett's tests were used to determine whether variance between  
197 categories was equal. Changes in cortisol, glucose and mass loss over time in experiment 1, and  
198 BUN from both experiments, were analysed using linear mixed effects models (LMEs), which  
199 included a random term for each individual (Chatfield, 1989; Crawley, 2002). Fixed effects  
200 included day postweaning, sex and treatment group. Models were fitted using maximum  
201 likelihood estimates and model selection was performed using ANOVA. Weaning mass and  
202 mass loss rate in experiment 2 were investigated using ANOVA.

203 Since body composition data is derived from body mass and water, MANOVA was used  
204 to investigate whether these two variables were different between treatment groups (Bennett et  
205 al., 2007). Where MANOVA indicated a significant treatment effect, the univariate analyses  
206 were examined, and where there was an effect on body water, protein and fat mass differences  
207 were explored. We had insufficient power to investigate the effects of sex on body composition.  
208 However, the number of males and females in each group was similar in each experiment.

## 209 **Results:**

210 **Time course in captive animals:** The effect of dexamethasone on cortisol in the two captive  
211 pups is shown in Fig. 1. Cortisol was elevated by 31% (male) and 58% (female) before injection  
212 in the dexamethasone trial compared with the start of the saline trial (Fig. 1). In both trials,  
213 cortisol levels fell within 4 h of treatment, but were substantially more reduced after  
214 dexamethasone treatment (cortisol = 0 - 14% of initial values) than after saline injection (cortisol



215 = 58 - 67% of initial values). Lowest cortisol levels occurred 8 - 12 h after dexamethasone  
216 injection. Cortisol recovered by 8-24 h after saline treatment and by 72 h after dexamethasone  
217 treatment.

218 **Cortisol in wild pups:** Cortisol changed significantly throughout the fast and the changes were  
219 different between groups (LME: AIC = 1594. 408; BIC = 1655. 911; Log Lik = -777. 2039, n  
220 (observations) = 160; n (individuals) = 29; Fig. 2A). SAL<sub>1</sub> animals showed a significant  
221 reduction in cortisol from days 1 and 4 to lower levels on days 7 and 10 ( $p < 0.04$ ). Cortisol then  
222 returned to levels similar to those at the start of the fast by day 11 and this increase approached  
223 significance ( $T = 1.803$ ;  $p = 0.074$ ). A similar, but smaller change was observed in the  
224 CONTROL animals ( $p < 0.08$ ). In this group, cortisol was also lower on day 14 than on day 1 of  
225 the fast ( $T = 2.055$ ;  $p = 0.0422$ ). DEX<sub>1</sub> animals showed a highly significant drop in cortisol 24  
226 hours after dexamethasone injection (day 11:  $T = 3.475$ ;  $p = 0.0007$ ), which recovered to pre-  
227 injection levels by day 14. The interaction between sex, treatment and day was not significant  
228 (ANOVA: L ratio = 8.582,  $p = 0.5721$ ). The differences in cortisol between treatment groups  
229 were not influenced by sex (ANOVA: L ratio = 2.648,  $p = 0.2661$ ), the changes in cortisol over  
230 time were not affected by sex (ANOVA: L ratio = 3.499,  $p = 0.6235$ ), and cortisol did not differ  
231 between the sexes (ANOVA: L ratio = 17.745,  $p = 0.473$ ).

232 **Mass loss in wild pups:** Weaning (Kruskal-Wallis:  $H_{(2)} = 1.16$ ,  $p = 0.559$ ; Table 1) and  
233 departure mass ( $32.9 \pm 4.9\text{kg}$ ) were not significantly different between the three groups in  
234 experiment 1 (MANOVA:  $F_{(4,52)} = 0.365$ ,  $p = 0.832$ ). The changes in rate of mass loss over  
235 three-day intervals were significantly different between groups (Fig. 2B) and this difference  
236 persisted when body mass was included as a covariate. All groups in experiment 1 showed a  
237 progressive decline in the rate of mass loss over the first ten days postweaning to a lower level.  
238 This did not change substantially thereafter in the CONTROL and SAL<sub>1</sub> (LME: AIC= -10.163;  
239 BIC = 59. 234; Log Lik = 28. 082, n (observations) = 151; n (individuals) = 29). However, in  
240 the DEX<sub>1</sub> group there was an increase in the rate of mass loss between one and three days after  
241 treatment (day 11-14) to levels comparable with those at the start of the fasting period. Rate of  
242 mass loss then declined to previous levels by day 17, and this reduction approached significance.  
243 There was no significant interaction between the effects of day, sex and treatment (ANOVA: L  
244 ratio = 10.613,  $p = 0.2246$ ). The differences in mass loss rate between treatment groups were not

245 influenced by sex (ANOVA: L ratio = 0.053,  $p = 0.9738$ ). However, the changes in mass loss  
246 rate over time were different between males and females, irrespective of treatment (ANOVA: L  
247 ratio = 10.280,  $p = 0.036$ ). Males had a significantly lower rate of mass loss over the first three  
248 days after weaning than females (LME:  $T = 2.247$ ;  $p = 0.0336$ ) and the rate of mass loss did not  
249 differ significantly between sexes thereafter ( $p > 0.05$ ). As a result, mass loss rate in females was  
250 significantly higher during the first three days of the fast compared with the remainder of the fast  
251 ( $P < 0.01$ ). In males, the rate of mass loss was lower at the start and declined less steeply. The  
252 rate of mass loss in male pups was not significantly reduced compared with values at the start of  
253 the fast until day 10 ( $p < 0.05$ ).

254 In experiment 2, there was no significant difference in initial body mass between groups  
255 (Table 1: ANOVA:  $F_{(1,28)} = 0.39$ ,  $p = 0.537$ ). Pups lost body mass at  $0.55 \pm 0.1 \text{ kg d}^{-1}$  and there  
256 were no differences between groups (ANOVA:  $F_{(1,28)} = 1.56$ ,  $p = 0.224$ ) in mass loss rate over the  
257 five days of the experiment.

258 **Body composition changes in wild pups:** In experiment 1, there was no significant difference  
259 in body composition (mass and body water combined) between the three treatment groups  
260 (MANOVA (Pillai's trace):  $F_{(4,32)} = 0.563$ ;  $p = 0.691$ ) at weaning (mean  $\pm$  S.D: body mass =  
261  $41.19 \pm 6.89 \text{ kg}$ ; water =  $18.36 \pm 2.35 \text{ kg}$ ; fat =  $20.40 \pm 4.08 \text{ kg}$ ; protein =  $5.57 \pm 0.68 \text{ kg}$ ;  $n =$   
262 22), and no significant difference in body composition between the SAL<sub>1</sub> treated and CONTROL  
263 pups combined ( $n = 10$ ) and the DEX<sub>1</sub> group ( $n = 11$ ) at departure (MANOVA (Pillai's trace):  
264  $F_{(2,8)} = 0.531$ ;  $p = 0.607$ ; mean  $\pm$  S.D: body mass =  $30.24 \pm 4.20 \text{ kg}$ ; water =  $11.45 \pm 1.67 \text{ kg}$ ;  
265 fat =  $14.94 \pm 2.58 \text{ kg}$ ; protein =  $3.37 \pm 0.54 \text{ kg}$ ).

266 In experiment 2, there was no significant difference at the start of the experiment in body  
267 mass and water content between groups (MANOVA: Pillai's trace = 0.005;  $F_{(2,17)} = 0.047$ ;  $p =$   
268 0.955). There was a significant difference in daily rate of mass and water loss between groups  
269 (MANOVA: Pillai's trace = 0.307;  $F_{(2,17)} = 3.767$ ;  $p = 0.044$ ). Both mass loss rate (ANOVA:  
270  $F_{(1,20)} = 5.07$ ,  $p = 0.037$ ) and water loss rate (ANOVA:  $F_{(1,20)} = 6.80$ ,  $p = 0.018$ ) were higher in  
271 DEX<sub>2</sub> pups compared with SAL<sub>2</sub> (Table 2). Fat and protein loss responded significantly  
272 differently to dexamethasone treatment (MANOVA: Pillai's trace = 0.317;  $F_{(2,18)} = 4.172$ ;  $p =$   
273 0.032); whereas the rate of fat loss was not different between groups (ANOVA:  $F_{(1,20)} = 0.22$ ,  $p =$

274 0.645), the rate of protein loss was significantly higher in DEX<sub>2</sub> pups (ANOVA:  $F_{(1,20)} = 6.62$ ,  $p =$   
275 0.019).

276 **Metabolites in wild pups:** In experiment 1, plasma BUN levels did not change significantly  
277 over the first seven days of the fast ( $p > 0.05$ ; mean =  $14.28 \pm 3.85$  (s.d.) mM) and showed a  
278 significant elevation on days 10 (LME:  $T = 2.414$ ;  $p = 0.0172$ ) and 11 (LME:  $T = 3.705$ ;  $p =$   
279  $0.003$ ) compared with day 1 (mean =  $16.73 \pm 5.22$  (s.d.) mM; LME: AIC = 920.807, n  
280 observations = 160; n individuals = 30). BUN on day 14 returned to levels that were not  
281 significantly different from those on day 1 (LME:  $T = 1.505$   $p = 0.1346$ ; mean =  $14.97 \pm 4.34$   
282 (s.d.) mM). This change in BUN did not differ significantly between groups (ANOVA: L ratio =  
283 5.98,  $p = 0.917$ ) or between sexes (ANOVA: L ratio = 17.067,  $p = 0.519$ ) and there was no  
284 interaction between effects of sex and group on the change in BUN over time (ANOVA: L ratio  
285 = 4.086,  $p = 0.9433$ ).

286 Glucose levels in experiment 1 showed a small but significant decline between day 1  
287 (mean =  $7.14 \pm 0.91$  (s.d.) mM and day 7 postweaning (LME:  $T = 3.544$ ;  $p = 0.0006$ ; n  
288 observations = 127; n individuals = 23), which did not change between days 7-11 (mean =  $6.30 \pm$   
289  $0.93$  (s.d.) mM;  $p > 0.05$ ). By day 14, glucose returned to levels that were not significantly  
290 different from those at the start of the fast (LME:  $T = 1.132$ ;  $p = 0.2602$ ) and this change was not  
291 significantly different between groups (ANOVA: L ratio = 13.60,  $p = 0.628$ ). There were too few  
292 females in the control group to investigate sex effects at the same time as treatment and day.  
293 However, there was no overall difference between males and females in glucose levels in the  
294 control group, where there was an imbalance in the sex ratio of the group (LME:  $T = 0.769$ ;  $p =$   
295  $0.4765$ ; n observations = 37; n individuals = 7; AIC = 104.249) and there was no interaction  
296 between the effects of sex and day on glucose levels (ANOVA: L ratio = 4.963;  $p = 0.6644$ ),  
297 indicating no difference in pattern of change in glucose over time between the sexes.

298 In experiment 2, there was a small but significant decline in BUN levels in the SAL<sub>2</sub>  
299 group (before injection =  $13.27 \pm 3.37$ mM vs after injection =  $11.34 \text{ mM} \pm 4.40$  (s.d.) mM; LME:  
300  $T = 2.484$ ;  $p = 0.0192$ ), which did not occur in the DEX<sub>2</sub> group (before injection =  $11.73 \pm 2.85$   
301 (s.d.) mM vs after injection =  $12.32 \pm 1.97$  (s.d.) mM; LME:  $T = 0.761$ ;  $p = 0.453$ ). There was no  
302 interaction between the effects of sex, group and day on BUN (ANOVA: L ratio = 1.250;  $p =$   
303  $0.2635$ ), there was no difference in the response of BUN to treatment between the sexes

304 (ANOVA: L ratio = 0.432;  $p = 0.5112$ ), and no difference in the change in BUN over time  
305 between the sexes (ANOVA: L ratio = 0.424;  $p = 0.5148$ ).

306 **Departure from the colony:** In experiment 1, there was no significant difference in log fast  
307 duration between groups (ANOVA:  $F_{(1, 28)} = 0.12$ ,  $p = 0.891$ ). Pups remained on the colony  $8.5$   
308  $\pm 5$  (s.d.) days after treatment (range = 2 - 23 days) and fasted for an average of  $19 \pm 5$  (s.d.) days.  
309 Fast duration was not recorded in experiment 2.

310 **Discussion:** We were able to produce near maximal inhibition of endogenous cortisol  
311 production for an appropriate duration to investigate the effects of high GC levels on fuel use and  
312 timing of departure in wild grey seal pups. Cortisol levels were reduced relative to pre-injection  
313 levels by 86% - 90% within four hours of treatment and remained suppressed for 48-72 hours.  
314 This occurred in the face of higher circulating cortisol levels prior to dexamethasone treatment  
315 compared to the same time on the previous day, which was likely a result of repeated handling  
316 (Sapolsky et al., 2000; Bennett et al., 2012). In bottlenose dolphins, humans and horses a similar  
317 or slightly higher mass-specific dose of dexamethasone causes suppression of circulating cortisol  
318 to 0-30% of initial levels within 24 hours and has observable effects on food seeking behaviour  
319 (Barton et al., 2002; Froin et al., 1998; Reidarson and McBain, 1999). The rapid, dramatic and  
320 sustained impact of the dose of dexamethasone used here indicated that it mimicked the negative  
321 feedback effect of high levels of endogenous cortisol over a period of 1-2 days. We therefore  
322 assumed that it had also reached GR targets in all parts of the body to induce other GR-mediated  
323 effects of the drug over a similar time frame.

324 GC can cause mass loss through their impact on gluconeogenesis, lipolysis and  
325 proteolysis in other animals (Darmaun et al., 1988; Divertie et al., 1991; Djurhuus et al., 2002;  
326 2004; Weiler et al., 1997). It has been proposed that cortisol promotes high rates of lipolysis to  
327 maintain a largely fat-based metabolism in fasting northern elephant seal pups (Ortiz et al., 2001  
328 a and b). It has also previously been suggested that cortisol could increase protein catabolism in  
329 fasting, lactating female Subantarctic fur seals (Guinet et al., 2004). In fasting male elephant  
330 seals, cortisol was negatively related to body mass and the lack of an increase in cortisol during  
331 fasting in these animals and fasting Subantarctic fur seal pups has been implicated in protein  
332 sparing (Crocker et al., 2012; Verrier et al., 2012). Consistent with this suggestion, here we

333 present the first direct experimental evidence that high GC levels can alter fuel allocation and  
334 mass loss rate, specifically by increasing protein break-down in fasting grey seal pups.

335 Mass loss rates were elevated 1-3 days after dexamethasone treatment relative to saline  
336 treated and untreated controls in experiment 1. Interestingly, in control and saline treated pups,  
337 changes in mass loss rate mirrored changes in cortisol levels, and this is consistent with findings  
338 in male elephant seals, which show a negative relationship between body mass and cortisol  
339 levels (Crocker et al., 2012). Here, although there were sex differences in the change in mass  
340 loss over time, the response to dexamethasone treatment was similar for males and females.  
341 These findings suggest that male and female grey seal pups have a similar response to GC. Short  
342 term (5 day) mass, water and protein loss were higher, and BUN levels failed to show a  
343 reduction, in dexamethasone treated animals compared with saline treated controls in experiment  
344 2. Dexamethasone treated pups lost, on average, 0.45kg more body mass and 0.1kg more protein  
345 over the five day period than saline treated pups. These differences, which were ~2.5 times the  
346 precision of the measurement in each case, represent an 18% higher daily mass loss rate and a  
347 22% higher daily rate of protein loss in dexamethasone treated animals. These small but  
348 significant differences between dexamethasone and saline treated pups suggest that natural  
349 changes in cortisol during fasting could affect fuel use in grey seal pups. Specifically, higher GC  
350 levels increase the rate of mass and protein loss, but not fat utilisation. Acute changes in cortisol  
351 as a result of physical restraint are accompanied by higher rates of gluconeogenesis in elephant  
352 seal pups (Champagne et al., 2012). The decline in cortisol at the start of the postweaning fast  
353 could contribute to the early reduction in the rate of mass loss in fasting grey seal pups (present  
354 study; Nordøy et al., 1990), through effects on gluconeogenesis and protein metabolism.

355 The reduction in cortisol levels followed by low stable levels seen here is comparable  
356 with previous work in the same species (Bennett et al., 2012) and consistent with previous  
357 findings from captive grey and harp seal pups and wild fasting Subantarctic fur seal pups and  
358 juvenile and breeding male northern elephant seals (Bennett et al., 2012; Crocker et al., 2012;  
359 Kelso et al., 2012; Nordøy et al., 1990; 1993; Verrier et al., 2012). Low cortisol may help to  
360 minimise rates of mass loss and promote protein sparing that is characteristic of fasting seals  
361 (Houser and Costa, 2001; Crocker et al., 2012; Nordøy and Blix, 1985; Kelso et al., 2012;  
362 Nordøy et al., 1990; 1993; Reilly, 1991). These findings contrast with the rise seen in cortisol in

363 fasting northern elephant seal pups in previous studies (Ortiz et al., 2001a and b). The difference  
364 between saline and control groups in the size of the drop in cortisol at the start of the fast may be  
365 due to the imbalance in the sex ratio in the two groups, although we found no evidence of a sex  
366 difference in cortisol levels in this study. In a previous study, females showed a decline in  
367 cortisol mid way through the fast that did not occur in males (Bennett et al., 2012). The greater  
368 reduction in cortisol in the saline treated group here may thus have resulted from the higher  
369 number of female pups in that group compared with the control group. However, despite sex  
370 differences in changes in mass loss over time, here we showed changes in mass loss in response  
371 to dexamethasone that were similar between male and female pups. Interestingly, in contrast to  
372 our findings, data from juvenile elephant seals suggest a synergistic impact of cortisol levels and  
373 sex hormones on fuel allocation during fasting that may contribute to sex differences in body  
374 composition (Kelso et al., 2012). The consequences of changes in cortisol levels on fuel  
375 metabolism during fasting thus require further investigation, particularly between species, sexes  
376 and age categories. As in other animals, the effects of GC on fuel metabolism are likely to  
377 depend on levels of and sensitivity to other simultaneous metabolic and hormonal signals, which  
378 may change throughout the fasting period and vary between individuals and species. Certainly  
379 studies in other pinniped species have demonstrated sex differences in hormone levels and fuel  
380 metabolism that may be causally linked, at least in older animals (e.g. Kelso et al., 2012).  
381 Manipulation of hormone levels, similar to that performed here, would allow these relationships  
382 to be tested experimentally in more detail.

383         The impact of GC on protein utilisation may have important consequences for the trade-  
384 offs grey seal pups face during the postweaning fast. Pups are predicted to starve to death from  
385 protein depletion well in advance of the significant loss of fat depots, and within up to two weeks  
386 of departure from the colony if they do not encounter food (Bennett et al., 2007). We predict  
387 that pups that maintain lower cortisol levels will reduce protein utilisation to a greater extent than  
388 those that maintain higher cortisol levels. They will therefore have the possibility of either  
389 fasting longer on land, which is associated with better developed diving abilities by departure  
390 (Bennett et al., 2010; Noren et al., 2008), or leaving the colony with a greater margin in protein  
391 reserves, which will provide more time in which to find food and learn to forage and/ or greater  
392 muscle mass that may increase muscle power and swimming ability. Higher rates of protein  
393 catabolism caused by increased GC may thus impact on survival in grey seals by indirectly

394 influencing diving abilities and time available to find food. Higher cortisol levels, for example  
395 as a result of infection (eg. Sures et al., 2006), or social encounters, such as aggression (eg.  
396 Abbot et al., 2003), may have a greater impact on time available to find food in pups that  
397 already face a trade-off between fast duration and diving capability due to their smaller size  
398 (Bennett et al., 2010).

399 A single dose of dexamethasone administered once after ten days of fasting did not alter  
400 the overall fuel utilisation and body composition changes measured at the end of the postweaning  
401 fast. Glucose levels in experiment 1 remained high, relative to fasting levels in dogs and humans  
402 (Steele et al., 1968; Umminger, 1975), and stable throughout the fast, as in other studies (Costa  
403 and Ortiz, 1982; Crocker et al., 2012; Kelso et al., 2012; Nordøy and Blix, 1991; Sakamoto et al.,  
404 2009; Schweigert, 1993). All groups in experiment 1 showed increased BUN levels, an index of  
405 protein catabolism, 24 hours after treatment. This could reflect a short lived increase in  
406 proteolysis as a result of acute natural increases in cortisol that were not measured here, but  
407 likely follow a handling episode (Bennett et al., 2012; Champagne et al., 2012; Engelhard et al.,  
408 2002; Sapolsky et al., 2000). Indeed, Champagne, et al. (2012) found that handling- induced  
409 elevations in cortisol were accompanied by increased gluconeogenesis in weaned elephant seal  
410 pups. Together our data demonstrate that the effects of the single dose of dexamethasone  
411 administered here on mass loss and fuel use were small and short lived relative to the whole post  
412 weaning fast.

413 Dexamethasone treatment did not prompt departure from the colony. In addition, control  
414 and saline treated pups left the colony without exhibiting a natural increase in cortisol levels, as  
415 was seen in a previous study (Bennett et al., 2012). Together these results suggest that, under  
416 normal circumstances, a sustained elevation in cortisol is not required to trigger departure from  
417 the colony in fasting grey seal pups. This is in agreement with the absence of an increase in  
418 cortisol even after more than 38 days of fasting in captive grey and harp seal pups (Nordøy et al.,  
419 1990; 1993). It does not support the suggested role of increasing cortisol levels as a signal that  
420 prompts departure from the colony in lactating Subantarctic fur seal females (Guinet et al., 2004)  
421 and northern elephant seal pups (Ortiz et al., 2001 a and b). In rats, humans and penguins  
422 (*Aptenodytes* sp.), circulating GC increase abruptly and dramatically and stimulate food seeking  
423 behaviour at the onset of phase III of fasting, when fat reserves reach a low critical threshold and  
424 protein catabolism increases to meet metabolic costs (Challet et al., 1995; Cherel et al., 1988 a, b

425 and c; 1992; Friedl et al., 2000; Groscolas and Robin, 2001; Robin et al., 1998). A cue to initiate  
426 foraging that occurs when fat reserves are already depleted would likely occur too late for seal  
427 pups to reach foraging grounds and learn to feed before the onset of terminal starvation due to  
428 compromised tissue structure and function. Indeed, as in other pinnipeds, there is no evidence  
429 that healthy grey seal pups enter phase III during the normal course of the postweaning fast  
430 (Nordøy et al., 1990).

431 Healthy grey seal pups may not respond to artificially high GC levels if other key  
432 hormonal and metabolic cues are not also present. For example, a dramatic change in fatty acid  
433 oxidation and BUN, prolactin and glucagon concentrations occur at the same time as elevated  
434 GC levels in animals on entry into phase III (Bernard et al., 2002a and b; Cherel et al., 1988 a, b  
435 and c; Groscolas and Robin, 2001; Le Maho et al., 1981; Robin et al., 1998). Our findings do  
436 not exclude the possibility that cortisol provides a cue to forage in seals when fat reserves are  
437 very low, such as in starvelings. However, our data suggest that elevated GC alone are not  
438 sufficient to prompt departure in healthy grey seal pups. It is therefore necessary to look  
439 elsewhere for endocrine cues that ordinarily terminate fasting and initiate food seeking behaviour  
440 in healthy phocid seal pups.

441



442 **Symbols and Abbreviations:**

443 ACTH = adrenocorticotrophic hormone; BUN = blood urea nitrogen; CONTROL = pups in  
444 experiment 1 that received no treatment; CRH = corticotropin releasing hormone; DEX<sub>1</sub> = pups  
445 in experiment 1 that received dexamethasone; DEX<sub>2</sub> = pups in experiment 2 that received  
446 dexamethasone; GC = glucocorticoids; GR = glucocorticoid receptor; <sup>2</sup>H<sub>2</sub>O = deuterium oxide;  
447 LME = linear mixed effect model; SAL<sub>1</sub> = pups in experiment 1 that received saline; SAL<sub>2</sub> =  
448 pups in experiment 2 that received saline; SMRU = Sea Mammal Research Unit

449 **Acknowledgments:**

450 The authors are grateful to Scottish Natural Heritage for the permit to work on the Isle of May,  
451 John Hammond, Ed Jones, Malcolm Auchie, Bernie McConnell, Mart Jussi, Aline Biuw (née  
452 Arriola) and Susan Gallon for assistance with animal capture and handling, and Paula Redman  
453 and Peter Thompson for isotope analysis.

454 **Funding:**

455 This work was supported by a UK Natural Environment Research Council studentship (KAB).  
456 Completion of the manuscript was supported by a SMRU Tim Waters Scholarship (KAB) and a  
457 McCain postdoctoral fellowship at Mount Allison University, Canada (KAB).

458

459 **References:**

- 460 **Abbot, D.H, Keverne, E.B., Bercovitch, F.B., Shively, C.A., Mendoza, S.P., Salman, W.,**  
461 **Snowdon, C.T., Ziegler, T.E. Banjevic, M., Garland Jr, T. and Saplosky, R.M.** (2003) Are  
462 subordinates always stressed? A comparative analysis of rank differences in cortisol levels  
463 amongst primates. *Horm. Behav.* **43**, 67-81.
- 464 **Arnbom, T., Fedak, M.A., Boyd, I.L. and McConnell, B.J.** (1993) Variation in weaning mass  
465 of pups in relation to maternal mass, postweaning fast duration, and weaned pup behaviour in  
466 southern elephant seals (*Mirounga leonina*) at South Georgia. *Can. J. Zool.* **71**, 1772-1781.
- 467 **Barton, C., March, S. and Wittert, G. A.** (2002). The low dose dexamethasone suppression  
468 test: Effect of time of administration and dose. *J. Endocrinol. Inv.* **25**, RC10-RC12.
- 469 **Bennett, K.A., Speakman, J.R., Moss, S.E.W. , Pomeroy, P. and Fedak, M.A.** (2007).  
470 Effects of mass and body composition on fasting fuel utilisation in grey seal pups (*Halichoerus*  
471 *grypus*: Fabricius): an experimental study using supplementary feeding. *J. Exp. Biol.* **210**, 3043-  
472 3053.
- 473 **Bennett, K.A., McConnell, B.J., Moss, S.E.W., Speakman, J.R., Pomeroy, P., Fedak, M.A.**  
474 (2010) Effects of age and body mass on development of diving capabilities of gray seal pups:  
475 costs and benefits of the postweaning fast. *Physiol. Biochem. Zool.* **83**, 911-923.
- 476 **Bennett, K.A., Moss, S.E.W., Pomeroy, P., Speakman, J.R. and Fedak, M.A.** (2012) Effects  
477 of handling regime and sex on changes in cortisol, thyroid hormones and body mass in fasting  
478 grey seal pups. *Comp. Biochem. Physiol. A.* **161**, 69-76.
- 479 **Bernard, S. F., Fayolle, C., Robin, J. P. and Groscolas, R.** (2002a). Glycerol and NEFA  
480 kinetics in long-term fasting king penguins: phase II versus phase III. *J. Exp. Biol.* **205**, 2745-  
481 2754.
- 482 **Bernard, S. F., Mioskowski, E. and Groscolas, R.** (2002b). Blockade of fatty acid oxidation  
483 mimics phase II-phase III transition in a fasting bird, the king penguin. *Am. J. Physiol.* **283**,  
484 R144-R152.

485 **Burns, J. M. and Castellini, M. A.** (1996). Physiological and behavioral determinants of the  
486 aerobic dive limit in Weddell seal (*Leptonychotes weddelli*) Pups. *J. Comp. Physiol. B* **166**, 473-  
487 483.

488 **Burns, J. M., Schreer, J. F. and Castellini, M. A.** (1997). Physiological effects on dive patterns  
489 and foraging strategies in yearling Weddell seals (*Leptonychotes weddelli*). *Can. J. Zool.* **75**,  
490 1796-1801.

491 **Burns, J. M., Lestyck, K.C., Folkow, L.P., Hammill, M.O. and Blix, A.S.** (2007) Size and  
492 distribution of oxygen stores in harp and hooded seals from birth to maturity. *J. Comp. Physiol.*  
493 *B.* **177**, 687-700.

494 **Caloin, M.** (2004). Modeling of lipid and protein depletion during total starvation. *Am. J.*  
495 *Physiol.* **287**, E790-798.

496 **Challet, E., Le Maho, Y., Robin, J. P., Malan, A. and Cherel, Y.** (1995). Involvement of  
497 corticosterone in the fasting-induced rise in protein-utilization and locomotor-activity.  
498 *Pharmacol. Biochem. Behav.* **50**, 405-412.

499 **Champagne, C.D., Houser, D.S., Costa, D.P. and Crocker, D.E.** (2012) The effects of  
500 handling and anaesthetic agents on the stress response and carbohydrate metabolism in northern  
501 elephant seals. *PLoS One* **7**, e38442.

502 **Chatfield, C.** (1989). *The Analysis of Time Series: an introduction*. London, New York:  
503 Chapman & Hall.

504 **Chen, H.-L. and Romsos, D. R.** (1996). Dexamethasone rapidly increases hypothalamic  
505 neuropeptide Y secretion in adrenalectomised *ob/ob* mice. *Am.J.Physiol.* **271**, E151-E158.

506 **Cherel, Y., Robin, J.-P. and Le Maho, Y.** (1988a). Physiology and biochemistry of long-term  
507 fasting in birds. *Can. J. Zool.* **66**, 159-166.

508 **Cherel, Y., Robin, J.-P., Walch, O., Karmann, H., Netchitailo, P. and Le Maho, Y.** (1988b).  
509 Fasting in king penguin I. Hormonal and metabolic changes during breeding. *Am. J. Physiol.* **254**,  
510 R170-R177.

- 511 **Cherel, Y., Leloup, J. and Le Maho, Y.** (1988c). Fasting in king penguin II. Hormonal and  
512 metabolic changes during molt. *Am. J. Physiol.* **254**, R178-R184.
- 513 **Cherel, Y., Robin, J. P., Heitz, A., Calgari, C. and Le Maho, Y.** (1992). Relationships  
514 between lipid Availability and protein- utilization during prolonged fasting. *J. Comp. Physiol. B*  
515 **162**, 305-313.
- 516 **Costa, D.P. and Ortiz, C.L.** (1982) Blood chemistry homeostasis during prolonged fasting in  
517 the northern elephant seal. *Am. J. Physiol.* **242**, R591-595.
- 518 **Costa, D.P., B.J. Le Boeuf, A.C. Huntley and Ortiz, C.L.** (1986) The energetics of lactation in  
519 the northern elephant seal, *Mirounga angustirostris*. *J. Zool.* **209**, 21-33.
- 520 **Crawley, M. J.** (2002). Mixed effects models. In *Statistical computing: An Introduction to Data*  
521 *Analysis Using S-Plus*, pp. 669-707. Chichester: John Wiley & Sons, Ltd
- 522 **Crocker, D.E., Ortiz, R. M., Houser, D.S., Webb, P.M. and Costa, D.P.** (2012). Hormone and  
523 metabolite changes associated with extended breeding fasts in male northern elephant seals  
524 (*Mirounga angustirostris*). *Comp. Biochem. Physiol. A.* **161**, 388-394.
- 525 **Darmaun, D., Matthews, D. E. and Bier, D. M.** (1988). Physiological hypercortisolemia  
526 increases proteolysis, glutamine, and alanine production. *Am. J. Physiol.* **255**, E366-E373.
- 527 **Debons, A. F., Zurek, L. D., Tse, C. S. and Abrahamsen, S.** (1986). Central nervous system  
528 control of hyperphagia in hypothalamic obesity: dependence on adrenal glucocorticoids.  
529 *Endocrinology* **118**, 1678-1681.
- 530 **Divertie, G. D., Jensen, M. D. and Miles, J. M.** (1991). Stimulation of lipolysis in humans by  
531 physiological hypercortisolemia. *Diabetes* **40**, 1228-1232.
- 532 **Djurhuus, C. B., Gravholt, C. H., Nielsen, S., Mengel, A., Christiansen, J. S., Schmitz, O. E.**  
533 **and Moller, N.** (2002). Effects of cortisol on lipolysis and regional interstitial glycerol levels in  
534 humans. *Am. J. Physiol.* **283**, E172-E177.

535 **Djurhuus, C. B., Gravholt, C. H., Nielsen, S., Pedersen, S. B., Moller, N. and Schmitz, O.**  
536 (2004). Additive effects of cortisol and growth hormone on regional and systemic lipolysis in  
537 humans. *Am. J. Physiol.* **286**, E488-E494.

538 **Engelhard, G. H., Brasseur, S. M. J. M., Hall, A. J., Burton, H. R. and Reijnders, P. J. H.**  
539 (2002). Adrencortical responsiveness in southern elephant seal mothers and pups during the  
540 lactation period and the effect of scientific handling. *J. Comp. Physiol.B.* **172**, 315-328.

541 **Friedl, K. E., Moore, R. J., Martinez-Lopez, L. E., Vogel, J. A., Askew, E. W., Marchitelli,**  
542 **L. J., Hoyt, R. W. and Gordon, C. C.** (1994). Lower limit of body fat in healthy active men. *J.*  
543 *App. Physiol.* **77**, 933-940.

544 **Froin, H. R., Assmann, G. and Hoppen, H. O.** (1998). Equine Cushing's syndrome. *Praktische*  
545 *Tierarzt* **79**, 16-21.

546 **Groscolas, R., Decrock, F., Thil, M.-A., Fayolle, C., Boissery, C. and Robin, J.-P.** (2000).  
547 Refeeding signal in fasting-incubating king penguins: changes in behaviour and egg temperature.  
548 *Am. J. Physiol.* **279**, R2104-R2112.

549 **Guinet, C., Servera, N., Mangin, S., Georges, J. Y. and Lacroix, A.** (2004). Change in plasma  
550 cortisol and metabolites during the attendance period ashore in fasting lactating subantarctic fur  
551 seals. *Comp. Biochem. Physiol. A* **137**, 523-531.

552 **Hall, A. J., McConnell, B. J. and Barker, R. J.** (2001). Factors affecting first-year survival in  
553 grey seals and their implications for life history strategy. *J. Anim. Ecol.* **70**, 138-149.

554 **Hall, A. J., McConnell, B. J. and Barker, R. J.** (2002). The effect of total immunoglobulin  
555 levels, mass and condition on the first-year survival of grey seal pups. *Funct. Ecol.* **16**, 462-474.

556 **Hall, A.J., Thomas, G.O., McConnell, B.J. and Barker, R.J.** (2009) Exposure to persistent  
557 organic pollutants and first-year survival probability in gray seal pups. *Env. Sci. Tech.* **43**, 6364-  
558 6369.

559 **Harding, K. C., Fujiwara, M., Axberg, Y. and Harkonen, T.** (2005). Mass-dependent  
560 energetics and survival in harbour seal pups. *Funct. Ecol.* **19**, 129-135.

- 561 **Hindell, M. A.** (1991). Some life history parameters of a declining population of southern  
562 elephant seals. *J. Anim. Ecol.* **60**, 119-134.
- 563 **Hindell, M. A., McConnell, B. J., Fedak, M. A., Slip, D. J. Burton, H. R., Reijnders, P. J. H.**  
564 **and McMahan, C. R.** (1999). Environmental and physiological determinants of successful  
565 foraging by naive southern elephant seal pups during their first trip to sea. *Can. J. Zool.* **77**,  
566 1807-1821.
- 567 **Houser, D. S. and Costa, D. P.** (2001). Protein catabolism in suckling and fasting northern  
568 elephant seal pups (*Mirounga angustirostris*). *J. Comp. Physiol. B* **171**, 635-642.
- 569 **Ihaka, R. and Gentleman, R.** (1996). R: A language for data analysis and graphics. *J. Comput.*  
570 *Graph. Stat.* **5**, 299-314.
- 571 **Irvine, L.G., Hindell, M.A. van den Hoff, J. and H.R. Burton.** (2000) The influence of body  
572 size on dive duration of underyearling southern elephant seals (*Mirounga leonina*). *J. Zool.* **251**,  
573 463-471.
- 574 **Kelso, E. J., Champagne, C.D., Tift, M.S., Houser, D.S. and Crocker, D.E.** (2012). Sex  
575 differences in fuel use and metabolism in fasting juvenile northern elephant seals. *J. Exp. Biol.*  
576 **215**, 2637-2645.
- 577 **Koubi, H. E., Robin, J.-P., Dewasmes, G., Le Maho, Y., Frutoso, J. and Minaire, Y.** (1991).  
578 Fasting-induced rise in locomotor activity in rats co-incides with increased protein utilisation.  
579 *Physiol. Behav.* **50**, 337-343.
- 580 **Krol, E. and Speakman, J.R.** (1999). Isotope dilution spaces of mice injected simultaneously  
581 with deuterium, tritium and oxygen-18. *J. Exp. Biol.* **202**, 2839-2849.
- 582 **Le Boeuf, B. J., Morris, P. and Reiter, J.** (1994). Juvenile survivorship of northern elephant  
583 seals. In *Elephant seals: population ecology, behavior and physiology*. (ed. B. J. Le Boeuf and R.  
584 M. Laws), pp 121-136. Berkeley, Los Angeles, London: University of California Press.
- 585 **Legaspi, A., Albert, J. D., Calvano, S. E., Brennan, M. F. and Lowry, S. F.** (1985).  
586 Proteolysis of skeletal-muscle in response to acute elevation of plasma-cortisol in man. *Surgical*  
587 *Forum* **36**, 16-18.

- 588 **Le Maho, Y., Vu Van Kha, H., Koubi, H., Dewasmes, G., Girard, J., Ferre, P. and Cagnard,**  
589 **M.** (1981). Body composition, energy expenditure, and plasma metabolites in long-term fasting  
590 geese. *Am.J. Physiol.* **241**, E342-E354.
- 591 **Lewis, M., Campagna, C., Uhart, M. and Ortiz, C.L.** (2001) Ontogenetic and seasonal  
592 variation in blood parameters in southern elephant seals. *Mar. Mamm. Sci.* **17**, 862-872.
- 593 **McConnell, B.M., Fedak, M.A., Burton, H.R. Englehard, G.H., Reijnders, P.J.H.** (2002)  
594 Movements and foraging areas of naïve, recently weaned southern elephant seal pups. *Anim.*  
595 *Ecol.* **71**, 65-78.
- 596 **McMahon, C. R., Burton, H. R. and Bester, M.N.** (2000). Weaning mass and the future  
597 survival of juvenile southern elephant seals, *Mirounga leonina*, at Macquarie Island. *Antarct. Sci.*  
598 **12**, 149-153.
- 599 **Nordøy, E. S. and Blix, A. S.** (1985). Energy sources in fasting grey seal pups evaluated with  
600 computed tomography. *Am. J. Physiol.* **249**, R471-R476.
- 601 **Nordøy, E. S. and Blix, A. S.** (1991). Glucose and ketone body turnover in fasting grey seal  
602 pups. *Acta. Physiol. Scand.* **141**, 565-571.
- 603 **Nordøy, E. S., Ingebretsen, O. C. and Blix, A. S.** (1990). Depressed metabolism and low  
604 protein catabolism in fasting grey seal pups. *Acta. Physiol. Scand.* **139**, 361-369.
- 605 **Nordøy, E. S., Aakvaag, A. and Larsen, T. S.** (1993). Metabolic adaptations to fasting in harp  
606 seal pups. *Physiol. Zool.* **66**, 926-945.
- 607 **Noren, D. P. and Mangel, M.** (2004). Energy reserve allocation in fasting northern elephant  
608 seal pups: inter-relationships between body condition and fasting duration. *Funct. Ecol.* **18**, 233-  
609 242.
- 610 **Noren, S.R., Iverson, S.J. and Boness, D.J.** (2005) Development of the blood and muscle  
611 oxygen stores in gray seals (*Halichoerus grypus*): implications for juvenile diving capacity and  
612 the necessity of a terrestrial postweaning fast. *Physiol. Biochem. Zool.* **78**, 482-490.

613 **Noren, S.R., Boness, D.J., Iverson, S.J., McMillan, J. and Bowen, W.D.** (2008) Body  
614 condition at weaning affects the duration of the postweaning fast in gray seal pups (*Halichoerus*  
615 *grypus*). *Physiol. Biochem. Zool.* **81**, 269-277.

616 **Ortiz, R. M., Wade, C. E. and Ortiz, C. L.** (2001a). Effects of prolonged fasting on plasma  
617 cortisol and TH in postweaned northern elephant seal pups. *Am. J. Physiol.* **280**, R790-R795.

618 **Ortiz, R. M., Noren, D. P., Litz, B. and Ortiz, C. L.** (2001b). A new perspective on adiposity  
619 in a naturally obese mammal. *Am. J. Physiol* **281**, E1347-E1351.

620 **Reidarson, T. H. and McBain, J. F.** (1999). Hematologic, biochemical, and endocrine effects  
621 of dexamethasone on bottlenose dolphins (*Tursiops truncatus*). *J. Zoo Wildlife Med.* **30**, 310-312.

622 **Reilly, J. J.** (1991). Adaptations to prolonged fasting in free-living, weaned gray seal pups. *Am.*  
623 *J. Physiol.* **260**, R267-R272.

624 **Reilly, J. J. and Fedak, M. A.** (1990). Measurement of the body composition of living gray  
625 seals by hydrogen isotope dilution. *J. Appl. Physiol.* **69**, 885-891.

626 **Robin, J.-P., Boucontet, L., Chillet, P. and Groscolas, R.** (1998) Behavioral changes in fasting  
627 emperor penguins: evidence for a "refeeding signal" linked to a metabolic shift. *Am. J. Physiol.*  
628 **274**, R746-R753.

629 **Sakamoto, K.Q., Sato, K., Naito, Y., Habara, Y., Ishizuka, M. and Fujita S.** (2009)  
630 Morphological features and blood parameters of Weddell seal (*Leptonychotes weddelli*) mothers  
631 and pups during the breeding season. *J. Vet. Med. Sci.* **71**, 341-344.

632 **Samra, J. S., Clark, M. L., Humphreys, S. M., MacDonald, I. A., Bannister, P. A. and**  
633 **Frayn, K. N.** (1998). Effects of physiological hypercortisolemia on the regulation of lipolysis in  
634 subcutaneous adipose tissue. *J. Clin. Endocrinol. Metab.* **83**, 626-631.

635 **Sapolsky, R.M., Romero, L.M., and Munck, A.U.** (2000). How do glucocorticoids influence  
636 stress responses? Integrating permissive, suppressive, stimulatory, and preparatory actions.  
637 *Endocrine Rev.* **2**, 55 - 89.



- 638 **Schweigert, F.J.** (1993) Effects of energy mobilization during fasting and lactation on plasma  
639 metabolites in the grey seal (*Halichoerus grypus*). *Comp. Biochem. Physiol. A* **10**, 347-352.
- 640 **Simmons, P. S., Miles, J. M., Gerich, J. E. and Haymond, M. W.** (1984). Increased  
641 proteolysis - an effect of increases in plasma cortisol within the physiologic range. *J. Clin. Inv.*  
642 **73**, 412-420.
- 643 **Soñanez-Organis, J. G., Vásquez-Medina, J., Zenteno-Savín, T., Aguilar, A., Crocker, D.E.,**  
644 **Ortiz, R.M.** (2012) Prolonged fasting increases purine recycling in post-weaned elephant seals. *J.*  
645 *Exp. Biol.* **215**, 1448-1455.
- 646 **Speakman, J.R. and Racey, P.A.** (1987). The equilibrium concentration of O-18 in body-water –  
647 implications for the accuracy of the doubly-labelled water technique and a potential new method of  
648 measuring RQ in free-living animals. *J. Theo.biol.* **127**, 79-95.
- 649 **Speakman, J.R. and Krol, E.** (2005). Validation of the doubly-labelled water method in a small  
650 mammal. *Phys. Biochem. Zool.* **78**, 650-667.
- 651 **Steele, R., Winkler, B., Rathgeb, I., Bjerknes, C. and Altszuler, N.** (1968) Plasma glucose  
652 and free fatty acid metabolism in normal and long-fasted dogs. *Am. J. Physiol.* **214**, 313-319.
- 653 **Sures, B., Lutz, I. and Kloas W.** (2006) Effects of infection with *Anguillcola crassus* and  
654 simultaneous exposure with Cd and 3, 3', 4, 4' 5-pentachlorobiphenyl (PCB 126) on the levels  
655 of cortisol and glucose in the European eel (*Anguilla anguilla*). *Parasitol.* **132**, 281-288.
- 656 **Thorson, P. H. and Le Boeuf, B. J.** (1994). Developmental aspects of diving in northern  
657 elephant seal pups. In *Elephant Seals: Population Ecology, Behavior and Physiology*, eds B. J.  
658 Le Boeuf and R. M. Laws, pp. 271-289. Berkeley, Los Angeles, London: University of  
659 California Press.
- 660 **Umminger, B.L.** (1975) Body size and whole blood sugar concentrations in mammals. *Comp.*  
661 *Biochem. Physiol. A* **52**, 455-458.
- 662 **Vásquez-Medina, J., Crocker, D.E., Forman, H.J., Ortiz, R.M.** (2010) Prolonged fasting does  
663 not increase oxidative damage or inflammation in postweaned northern elephant seal pups. *J.*  
664 *Exp. Biol.* **213**, 2524-2530.

665 **Vásquez-Medina, J., Zenteno-Savín, T., Forman, H.J., Crocker, D.E., Ortiz, R.M.** (2011)  
666 Prolonged fasting increases glutathione biosynthesis in postweaned northern elephant seal pups.  
667 *J. Exp. Biol.* 214, 1294-1299.

668 **Verrier, D., Atkinson, S., Guinet, C., Groscolas, R. and Arnould, J. P. Y.** (2012). Hormonal  
669 responses to extreme fasting in subantarctic fur seal (*Arctocephalus tropicalis*) pups. *Am. J.*  
670 *Physiol.* **302**, R929- R940.

671 **Weiler, H. A., Wang, Z. and Atkinson, S. A.** (1997). Whole body lean mass is altered by  
672 dexamethasone treatment through reductions in protein and energy utilization in piglets. *Biol.*  
673 *Neonate* **71**, 53-59.

674 **Woldstad, S. and Jenssen, B.J.** (1999) Thyroid hormones in grey seal pups (*Halichoerus*  
675 *grypus*). *Comp. Biochem. Physiol. A* **122**, 157-162.

676

677 **Figure legends:**

678 **Figure 1:** Changes in cortisol in plasma from two captive 10 month old grey seal pups  
679 (diamonds = male; circles = female) in response to saline (open symbols) and dexamethasone  
680 (closed symbols) injection. Inter and intra assay coefficients of variation are <11% and <10%,  
681 respectively, and percentage recovery is 82.75-91.64% for this assay (Bennett et al., 2012).

682 **Figure 2:** Changes in mean  $\pm$  s.d. a. plasma cortisol and b. daily rate of mass loss in control  
683 (squares), saline (triangles) and dexamethasone (circles) treated pups in 2002 up to 14 days  
684 postweaning. A black arrow indicates the time of injection of either saline or dexamethasone.  
685 Points with the same letter do not differ from each other, either within a treatment between days,  
686 or between treatments on a given day postweaning ( $p < 0.05$ ). Underlined letters represent  
687 CONTROL pups, lower case letters represent saline treated (SAL<sub>1</sub>) and italics represent  
688 dexamethasone treated (DEX<sub>1</sub>) pups.

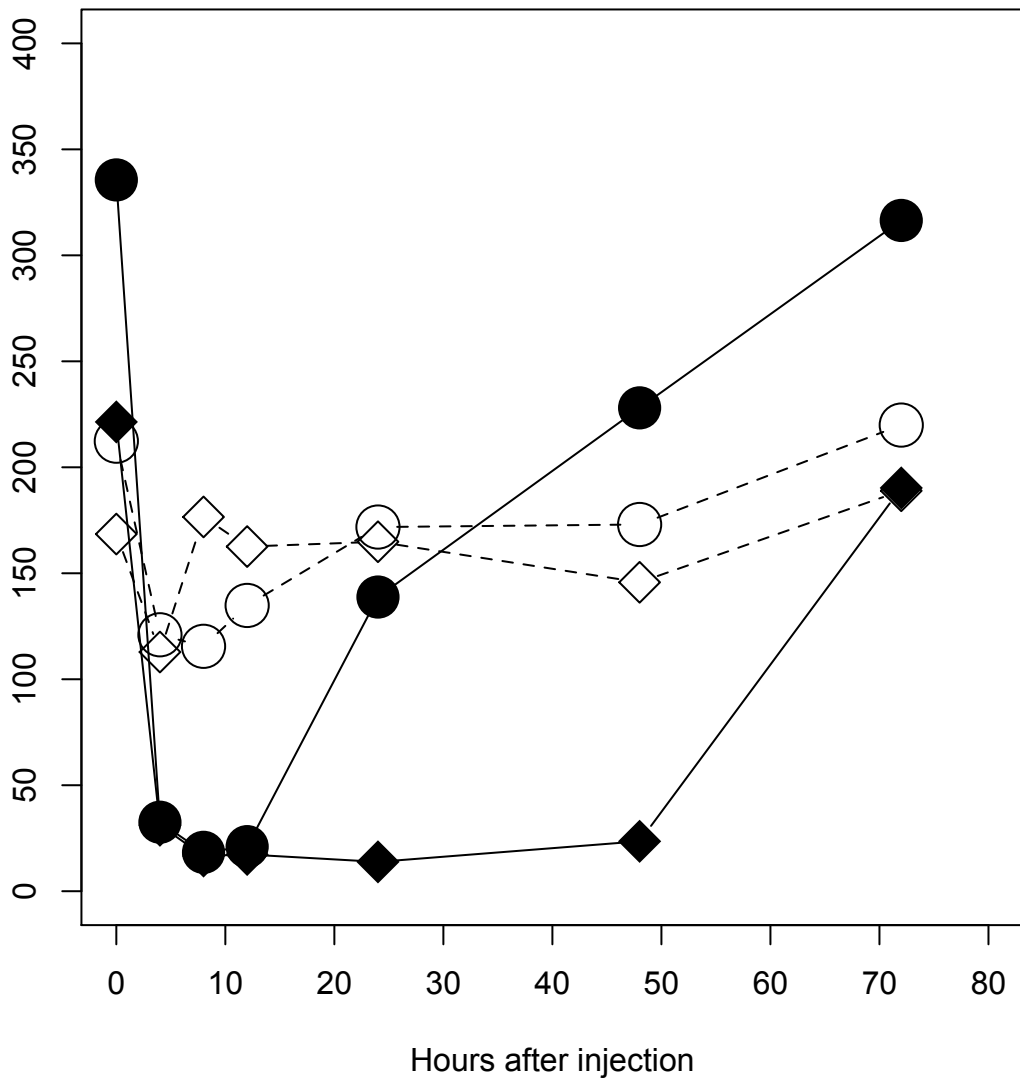

Figure 2

**A**

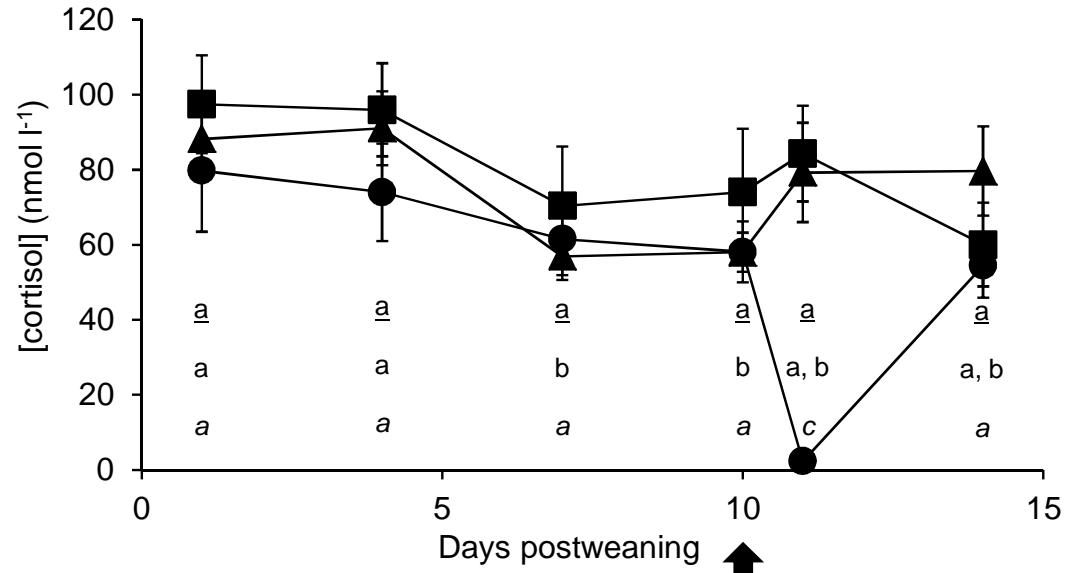

**B**

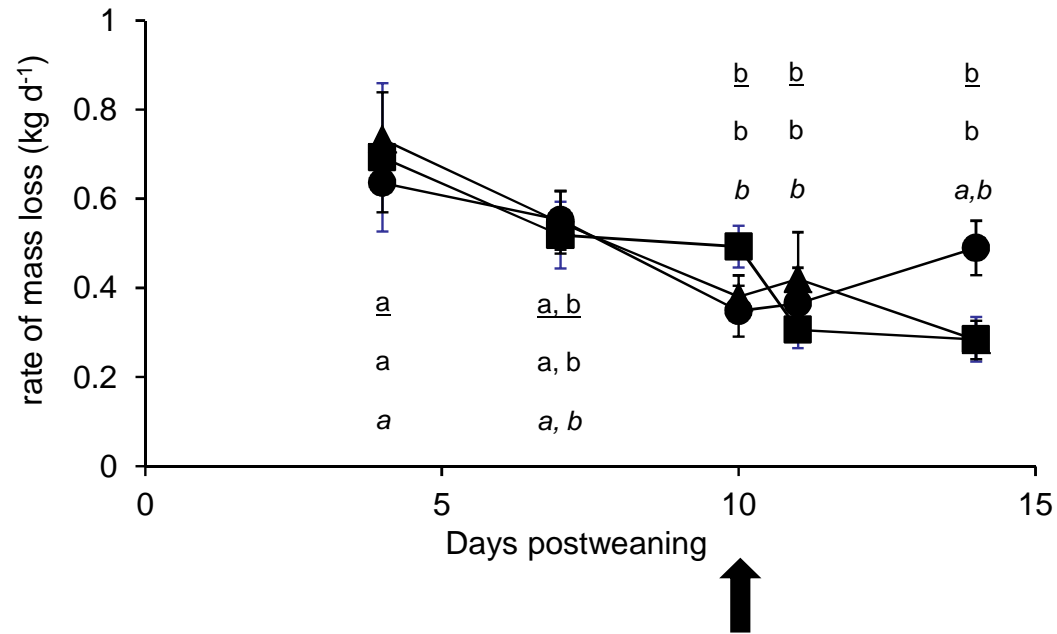

Table 1: Number of male and female pups and mean  $\pm$  s.d. mass for each treatment group

| Group                 | Weaning mass (2002) or mass at first capture (2004)<br>(kg) |   |                  |   |
|-----------------------|-------------------------------------------------------------|---|------------------|---|
|                       | Males                                                       | n | Females          | n |
| CONTROL <sub>02</sub> | 42.87 $\pm$ 6.63                                            | 6 | 40.99 $\pm$ 2.98 | 3 |
| SAL <sub>02</sub>     | 46.27 $\pm$ 4.93                                            | 5 | 41.12 $\pm$ 5.23 | 5 |
| DEX <sub>02</sub>     | 43.54 $\pm$ 6.79                                            | 5 | 41.67 $\pm$ 7.93 | 5 |
| SAL <sub>04</sub>     | 40.89 $\pm$ 5.04                                            | 8 | 37.11 $\pm$ 5.16 | 7 |
| DEX <sub>04</sub>     | 41.93 $\pm$ 6.31                                            | 7 | 35.94 $\pm$ 3.09 | 8 |

Table 2: Mean  $\pm$  s.d. change in body composition variables during the five days after saline or dexamethasone treatment in fasting grey seal pups in experiment 2. Bold highlights significant differences ( $p < 0.05$ ) between groups.

|                       | SAL <sub>04</sub>                 | n  | DEX <sub>04</sub>                 | n  |
|-----------------------|-----------------------------------|----|-----------------------------------|----|
| $\Delta$ Mass (kg)    | <b>0.50 <math>\pm</math> 0.07</b> |    | <b>0.59 <math>\pm</math> 0.10</b> |    |
| $\Delta$ Water (kg)   | <b>0.26 <math>\pm</math> 0.06</b> |    | <b>0.34 <math>\pm</math> 0.07</b> |    |
| $\Delta$ Fat (kg)     | 0.14 $\pm$ 0.10                   | 10 | 0.12 $\pm$ 0.09                   | 11 |
| $\Delta$ Protein (kg) | <b>0.09 <math>\pm</math> 0.02</b> |    | <b>0.11 <math>\pm</math> 0.03</b> |    |
| $\Delta$ Ash (kg)     | 0.01 $\pm$ 0.002                  |    | 0.01 $\pm$ 0.003                  |    |
